# Supplementary figures and images for: Diagnostic exome sequencing in 266 Dutch patients with visual impairment
Source: PubMed Central journal article supplement — Eur J Hum Genet. 2017 Feb 22;25(5):591–9. doi: 10.1038/ejhg.2017.9 (PMC5437915; doi:10.1038/ejhg.2017.9), 2017-02-22

Percentage base-pairs covered by at least 20x

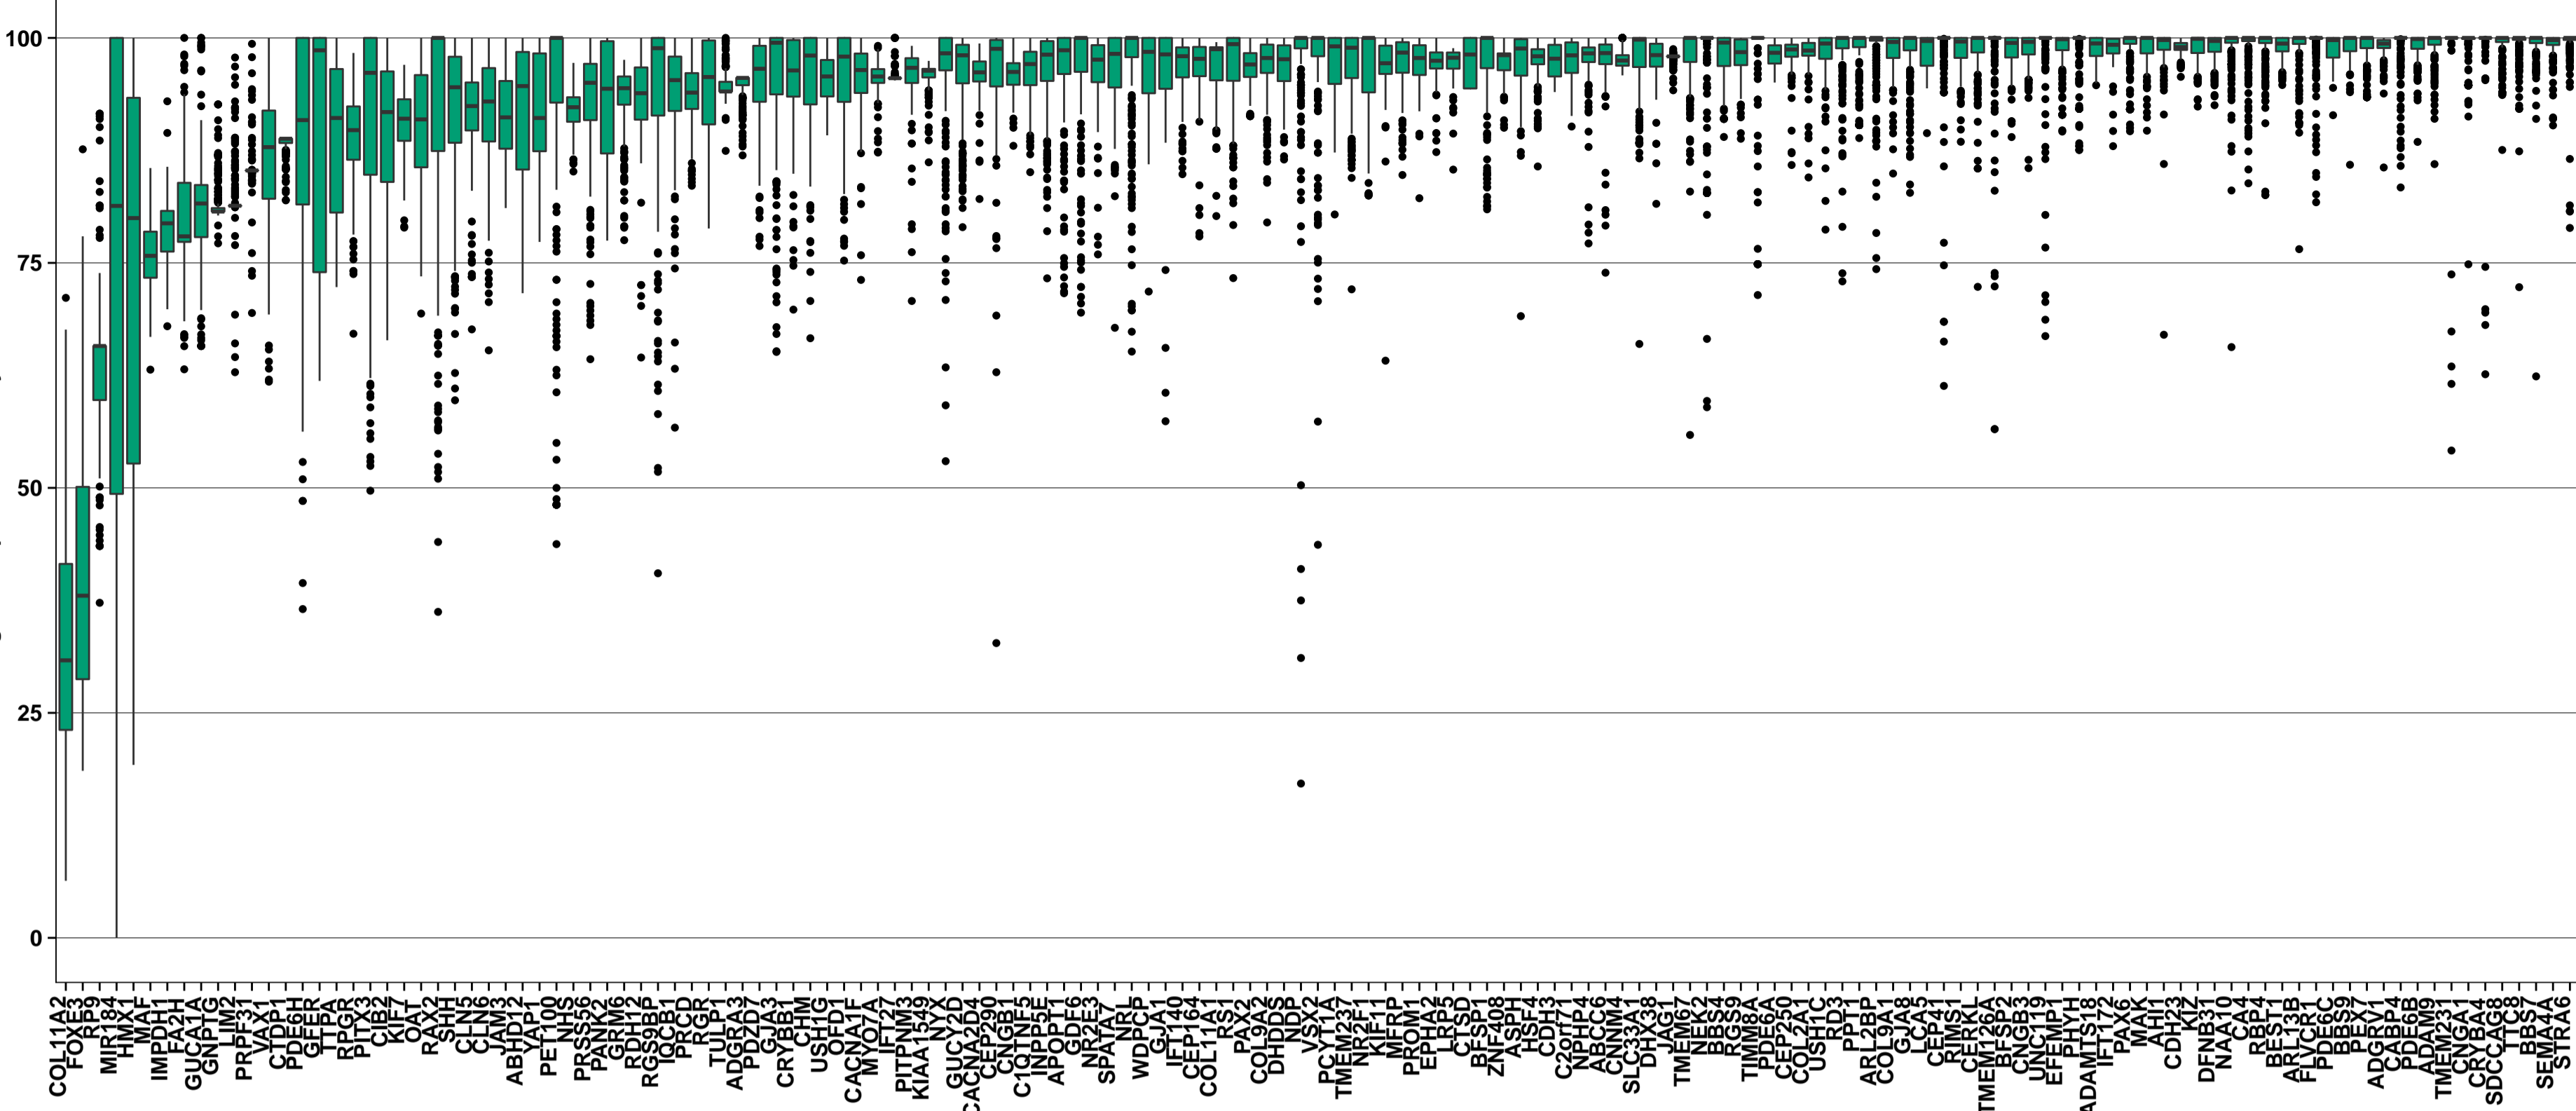

Percentage base-pairs covered by at least 20x

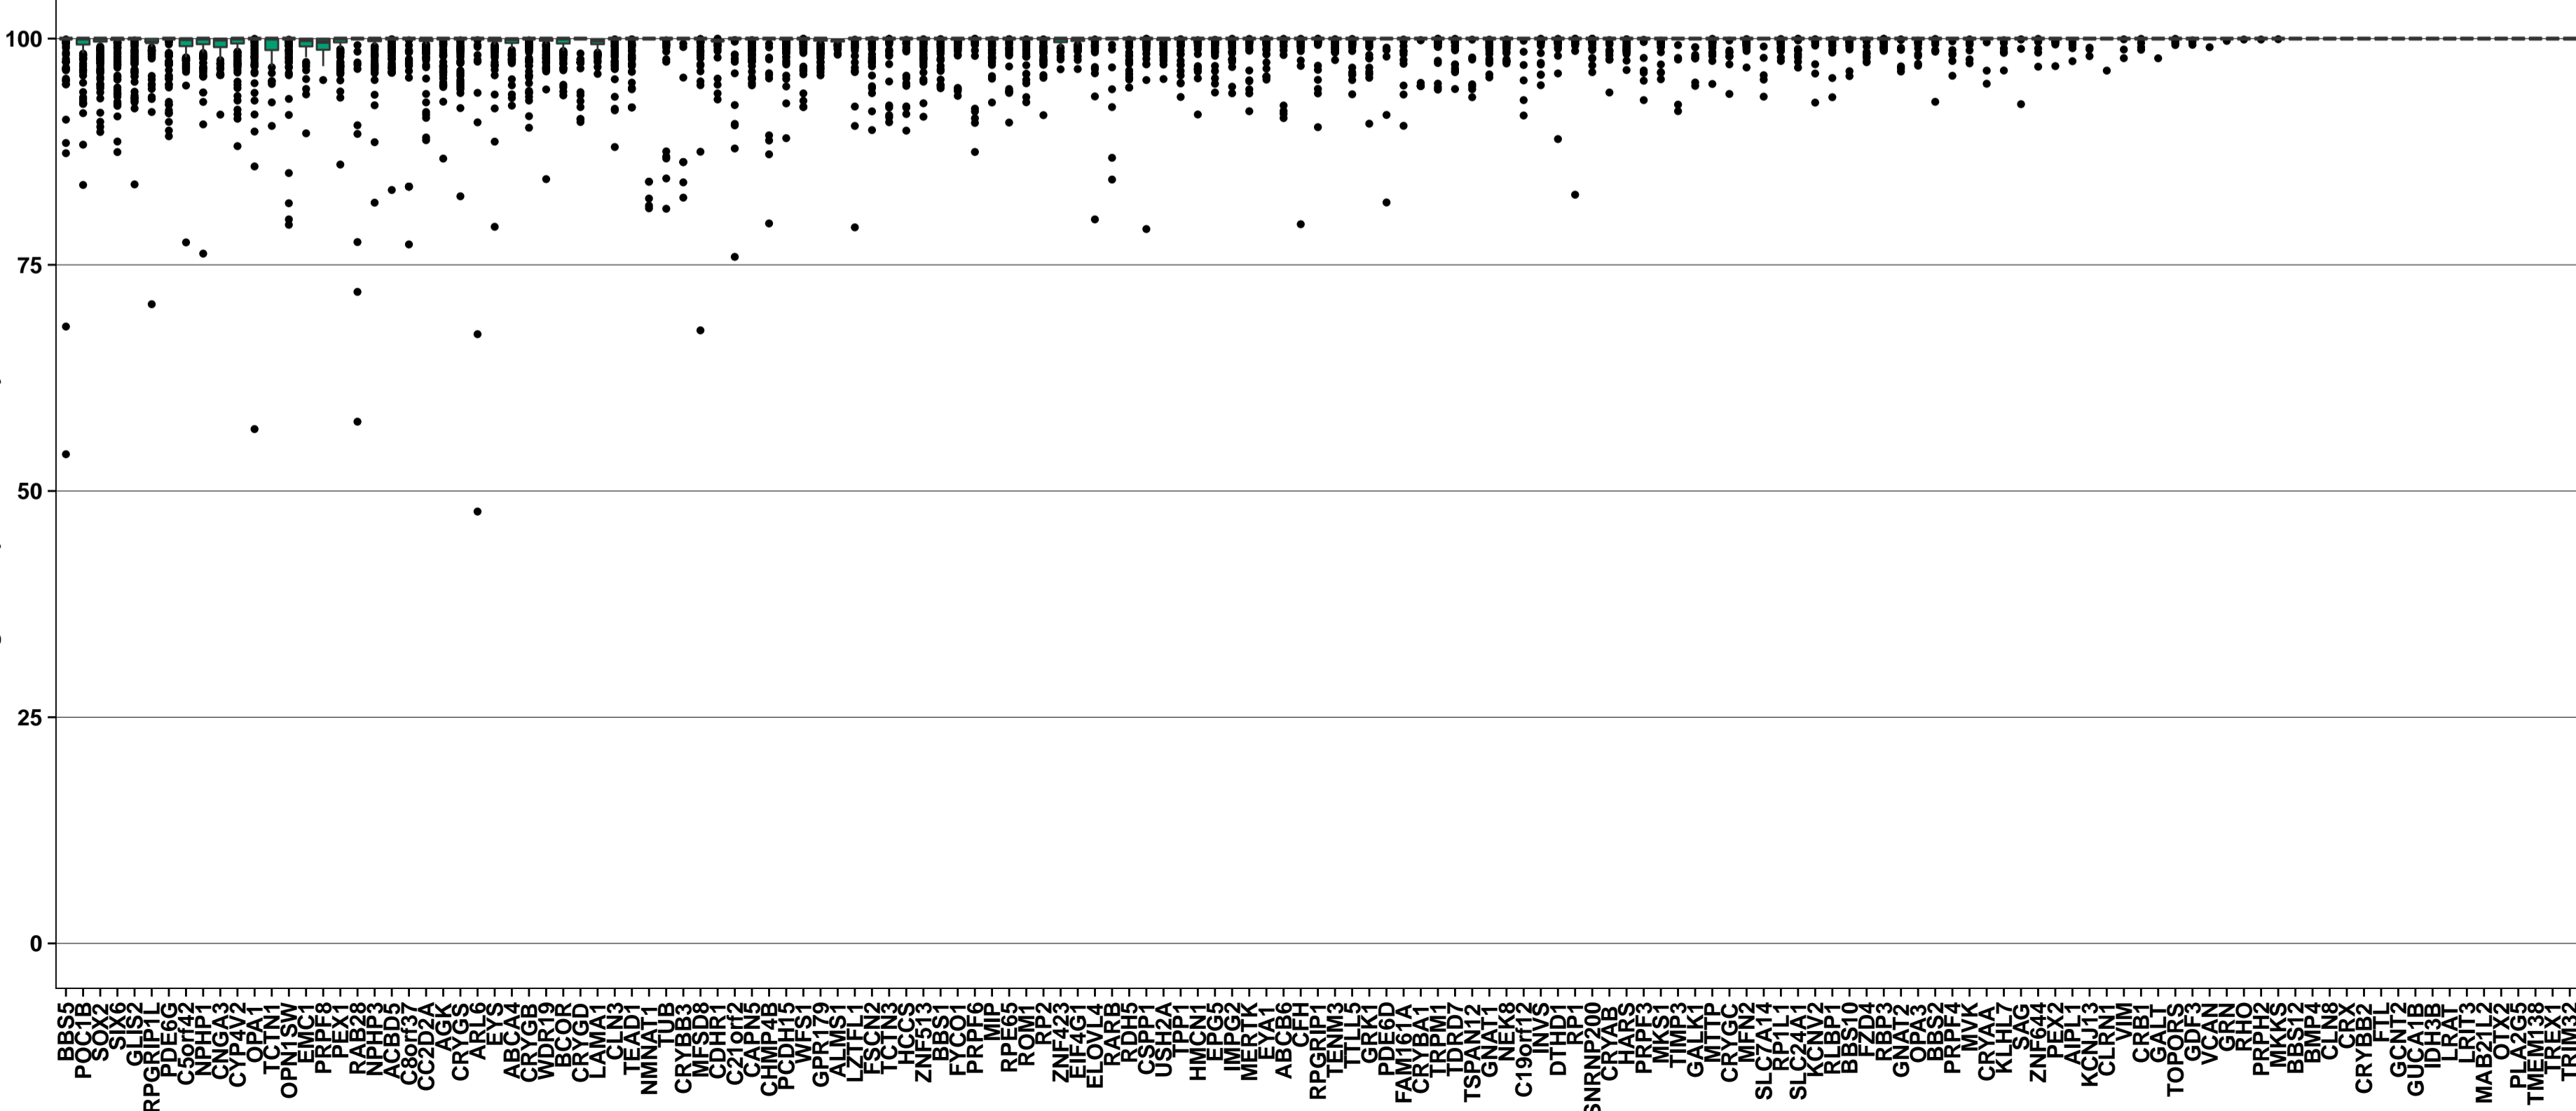

Supplement: ejhg20179x2.pdf [file ejhg20179x2.pdf]
